# Supplementary material for: In situ tracking and characterisation of scorpionate ligands via11B-NMR spectroscopy
Source: Royal Society of Chemistry journal article supplement (doi:10.1039/d0ra10826j), 2021-01-01
Supplement: d0ra10826j1.pdf [file d0ra10826j1.pdf]

**Supporting Information**

***In situ* Tracking and Characterisation of Scorpionate Ligands via  $^{11}\text{B}$ -NMR Spectroscopy**

Jarrold R. Thomas<sup>a</sup> and Scott A. Sulway<sup>a\*</sup>

<sup>a</sup>School of Chemistry, The University of New South Wales, Sydney 2052, Australia

\*Corresponding Author E-mail: s.sulway@unsw.edu.au

**Table of Contents**

|                                                                   |    |
|-------------------------------------------------------------------|----|
| 1 Experimental .....                                              | 1  |
| 2 NMR Spectra of Scorpionates .....                               | 3  |
| 3 Crystallographic Data and Figures of Scorpionate <b>6</b> ..... | 9  |
| 4 Reference .....                                                 | 11 |

## 1 Experimental

### General Procedure

All reactions that required an inert atmosphere were carried out using standard Schlenk technique under nitrogen. Pyrazole and 3,5-dimethylpyrazole were purchased through Sigma-Aldrich without further purification. Pyrazole derivatives of 3-phenylpyrazole, 3-[2'-pyridyl]-pyrazole and 3-[4'-pyridyl]-pyrazole were prepared adopting a literature procedure<sup>1</sup> and confirmed with <sup>1</sup>H-NMR spectroscopy.

All NMR Data was collected at the Mark Wainwright analytical centre (MWAC) using a 400 MHz Bruker Advanced III fitted with BBFO temperature probes. Deuterated solvents were purchased through Sigma-Aldrich and used without further manipulations. Single crystal XRD experiments were run at MWAC, collected on a Bruker APEX-II CCD diffractometer equipped with a MoK<sub>α</sub> radiation source ( $\lambda = 0.71073 \text{ \AA}$ ). Single crystal data was processed using Olex2 graphical user interface<sup>2</sup>; structures were solved using *SHELXT*<sup>3</sup> with intrinsic phasing and refined with *SHELXL*<sup>4</sup> employing a least square minimisation method. The riding model was implemented when solving structures for placement of hydrogen atoms. ATR FTIR data were collected on a Cary 630 FTIR ATR spectrometer. CHN analysis for scorpionates **1-5** were performed at the Campbell Microanalytical Laboratory at the University of Otago.

### Potassium hydrotris(pyrazolyl)borate (KTp) **1**

Pyrazole (11.54 g, 169.5 mmol) and KBH<sub>4</sub> (2.31 g, 42.8 mmol) were mixed and placed under a nitrogen atmosphere. This solid mixture was heated to roughly 200°C and left to air condense for 24 hrs. The resulting white solid residue was left to cool before being washed with several portions of toluene (4 x 40 ml). During washing, mixture was sonicated to ensure reagent dissolution. Product was isolated via filtration and further washed with toluene (10 ml) and warm hexane (30 ml) to produce a white powder (8.31 g, 33.0 mmol, 77%). Elemental analysis calculated (%) for K<sub>1</sub>B<sub>1</sub>C<sub>9</sub>N<sub>6</sub>H<sub>10</sub>: C 42.87, N 33.33, H 4.00; found: C 43.21, N 33.60, H 3.68. FTIR (KBr disc): 2388 cm<sup>-1</sup> (s,  $\nu_{\text{B-H}}$ ). NMR (*d*<sub>6</sub>-acetone, 298 K, 400 MHz): <sup>1</sup>H (400 MHz);  $\delta$ 7.57 (dd, 3H, <sup>3</sup>J<sub>HH</sub> = 2.10 Hz <sup>4</sup>J<sub>HH</sub> = 0.58, pz-H<sup>5</sup>),  $\delta$ 7.37 (d, 3H, <sup>3</sup>J<sub>HH</sub> = 1.24 Hz, pz-H<sup>3</sup>)  $\delta$ 6.02 (dd, 3H, <sup>3</sup>J<sub>HH</sub> = 2.02 and 1.66 Hz, pz-H<sup>4</sup>)  $\delta$ 4.84 (quart, 1H, <sup>1</sup>J<sub>HB</sub> = 104.5 Hz, B-H hydride), <sup>11</sup>B (128 MHz);  $\delta$ -1.35 (d, <sup>1</sup>J<sub>BH</sub> = 107.6 Hz, B-H borate).

### Potassium hydrotris(3,5-dimethylpyrazolyl)borate (KTp<sup>Me2</sup>) **2**

Method as for scorpionate **1** using 3,5-dimethylpyrazole (7.75 g, 80.6 mmol) and KBH<sub>4</sub> (1.23 g, 22.8 mmol), yielding a white powder (5.04 g, 15.0 mmol, 66%). Elemental analysis calculated (%) for K<sub>1</sub>B<sub>1</sub>C<sub>15</sub>N<sub>6</sub>H<sub>40</sub>: C 53.57, N 24.99, H 6.59; found: C 53.87, N 24.67, H 6.42. FTIR (KBr disc): 2438 cm<sup>-1</sup> (s,  $\nu_{\text{B-H}}$ ). NMR (*d*<sub>6</sub>-acetone, 298 K, 400 MHz): <sup>1</sup>H (400 MHz)  $\delta$ 5.56 (s, 3H, pz-H)  $\delta$ 4.75 (quart, 1H, <sup>1</sup>J<sub>HB</sub> = 93.5 Hz, B-H hydride),  $\delta$ 2.19 (s, 9H, Me),  $\delta$ 2.03 (s, 9H, Me), <sup>11</sup>B (128 MHz);  $\delta$ -7.01 (d, <sup>1</sup>J<sub>BH</sub> = 99.5 Hz, B-H borate).

### Potassium hydrotris(3-phenylpyrazolyl)borate (KTp<sup>Ph</sup>) **3**

Method as for scorpionate **1** using 3-phenylpyrazole (8.54 g, 58.4 mmol) and KBH<sub>4</sub> (1.02 g, 18.9 mmol), at roughly 190°C for 1 hour. Reaction yielded a white powder (5.85 g, 12.0 mmol, 63%). Scorpionate **3** was dissolved in MeCN from which [KTp<sup>Ph</sup>(MeCN)<sub>3</sub>], scorpionate **6**, recrystallised. Elemental analysis calculated (%) for K<sub>1</sub>B<sub>1</sub>C<sub>27</sub>N<sub>6</sub>H<sub>22</sub>: C 67.50, N 17.49, H 4.62; found: C 67.51, N 17.38, H 4.39. FTIR (KBr disc): 2403 cm<sup>-1</sup> (s,  $\nu_{\text{B-H}}$ ). NMR (*d*<sub>6</sub>-acetone, 298 K, 400 MHz): <sup>1</sup>H (400

MHz);  $\delta$ 7.84 (d, 2H,  $^3J_{\text{HH}} = 7.13$  Hz, Ph-H),  $\delta$ 7.71 (d, 1H,  $^3J_{\text{HH}} = 2.18$  Hz, pz-H),  $\delta$ 7.29 (t, 2H,  $^3J_{\text{HH}} = 7.61$  Hz, Ph-H),  $\delta$ 7.16 (t, 1H,  $^3J_{\text{HH}} = 6.04$  Hz, Ph-H),  $\delta$ 6.49 (d, 1H,  $^3J_{\text{HH}} = 2.20$  Hz, pz-H),  $^{11}\text{B}$  (128 MHz);  $\delta$ -1.00 (d,  $^1J_{\text{BH}} = 105.1$  Hz, B-H borate).

#### **Potassium hydrotris(3-[2'-pyridyl]-pyrazolyl)borate (KTP<sup>2-py</sup>) 4**

Method as for scorpionate **1** using 3-[2'-pyridyl]-pyrazole (2.60 g, 17.9 mmol) and  $\text{KBH}_4$  (0.28 g, 5.19 mmol), yielding a white powder (1.50 g, 3.22 mmol, 62%). Elemental analysis calculated (%) for  $\text{K}_1\text{B}_1\text{C}_{24}\text{N}_9\text{H}_{19}$ : C 59.63, N 26.08, H 3.96; found: C 59.52, N 25.93, H 3.89. FTIR (KBr disc):  $2433\text{ cm}^{-1}$  (s,  $\nu_{\text{B-H}}$ ). NMR ( $d_6$ -acetone, 298 K, 400 MHz):  $^1\text{H}$  (400 MHz);  $\delta$ 8.58 (dd, 1H,  $^3J_{\text{HH}} = 4.82$  Hz,  $^4J_{\text{HH}} = 0.66$  Hz, pz-H),  $\delta$ 7.98 (d, 1H,  $^3J_{\text{HH}} = 7.96$  Hz, py-H),  $\delta$ 7.80 (td, 1H,  $^3J_{\text{HH}} = 7.71$ ,  $^4J_{\text{HH}} = 1.80$  Hz, py-H),  $\delta$ 7.72 (s, 1H, py-H),  $\delta$ 7.26 (ddd, 1H,  $^3J_{\text{HH}} = 7.46$  and  $4.86$  Hz,  $^4J_{\text{HH}} = 1.10$  Hz, py-H),  $\delta$ 6.91 (d, 1H,  $^3J_{\text{HH}} = 2.16$  Hz, pz-H),  $^{11}\text{B}$  (128 MHz);  $\delta$ -1.41 (d,  $^1J_{\text{BH}} = 100.8$  Hz, B-H borate).

#### **Potassium hydrotris(3-[4'-pyridyl]-pyrazolyl)borate (KTP<sup>4-py</sup>) 5**

Method as for scorpionate **1** using 3-[4'-pyridyl]-pyrazole (6.34 g, 43.7 mmol) and  $\text{KBH}_4$  (0.59 g, 10.9 mmol), yielding a white powder (3.53 g, 7.30 mmol, 67%). Elemental analysis calculated (%) for  $\text{K}_1\text{B}_1\text{C}_{24}\text{N}_9\text{H}_{19}$ : C 59.63, N 26.08, H 3.96; found: C 59.36, N 25.77, H 4.15. FTIR (KBr disc):  $2420\text{ cm}^{-1}$  (s,  $\nu_{\text{B-H}}$ ). NMR ( $d_6$ -acetone, 298 K, 400 MHz):  $^1\text{H}$  (400 MHz);  $\delta$ 8.48 (d, 2H,  $^3J_{\text{HH}} = 6.03$  Hz, py-H),  $\delta$ 7.80 (d, 2H,  $^3J_{\text{HH}} = 6.12$  Hz, py-H),  $\delta$ 7.74 (d, 1H,  $J_{\text{HH}} = 2.25$  Hz, pz-H),  $\delta$ 6.68 (d, 1H,  $^3J_{\text{HH}} = 2.23$  Hz, pz-H),  $^{11}\text{B}$  (128 MHz);  $\delta$ -0.79 (d,  $^1J_{\text{BH}} = 112.4$  Hz, B-H borate).

## 2 NMR Spectra of Scorpionates

Scorpionate 1

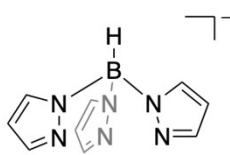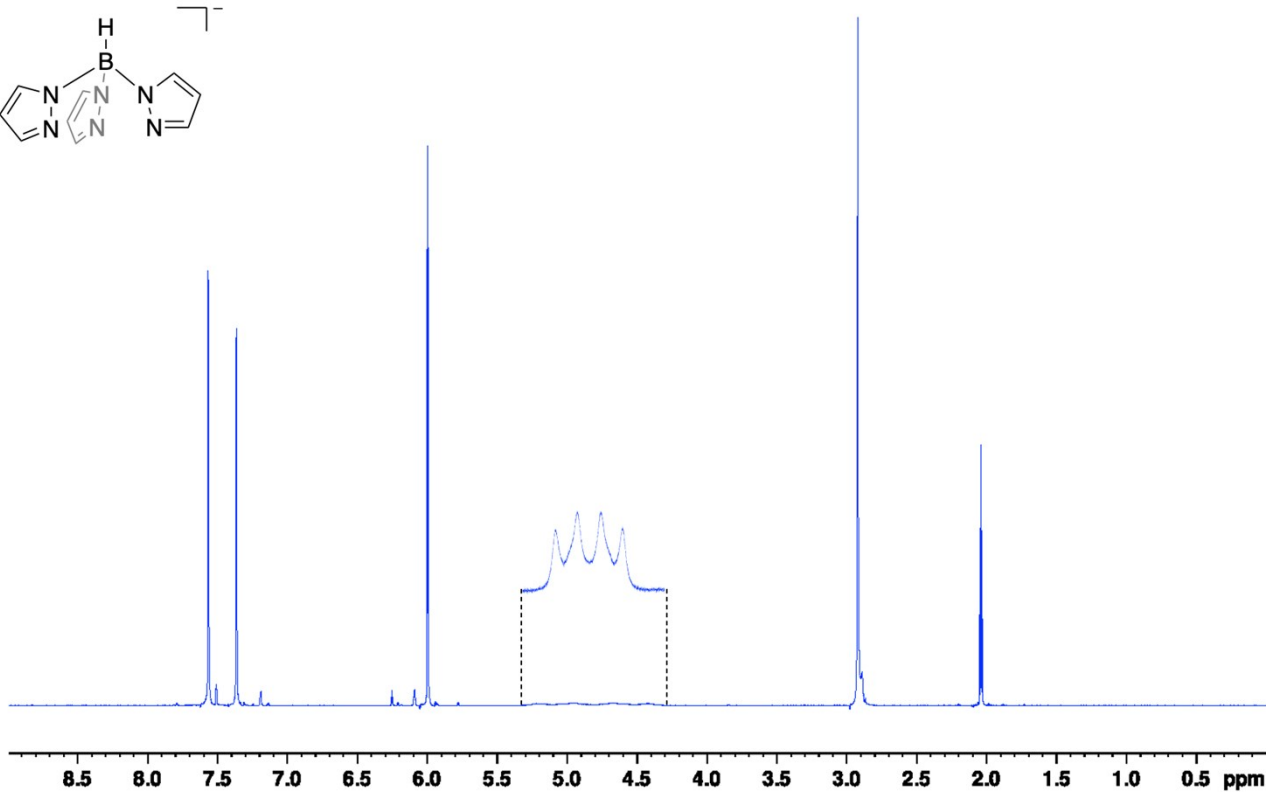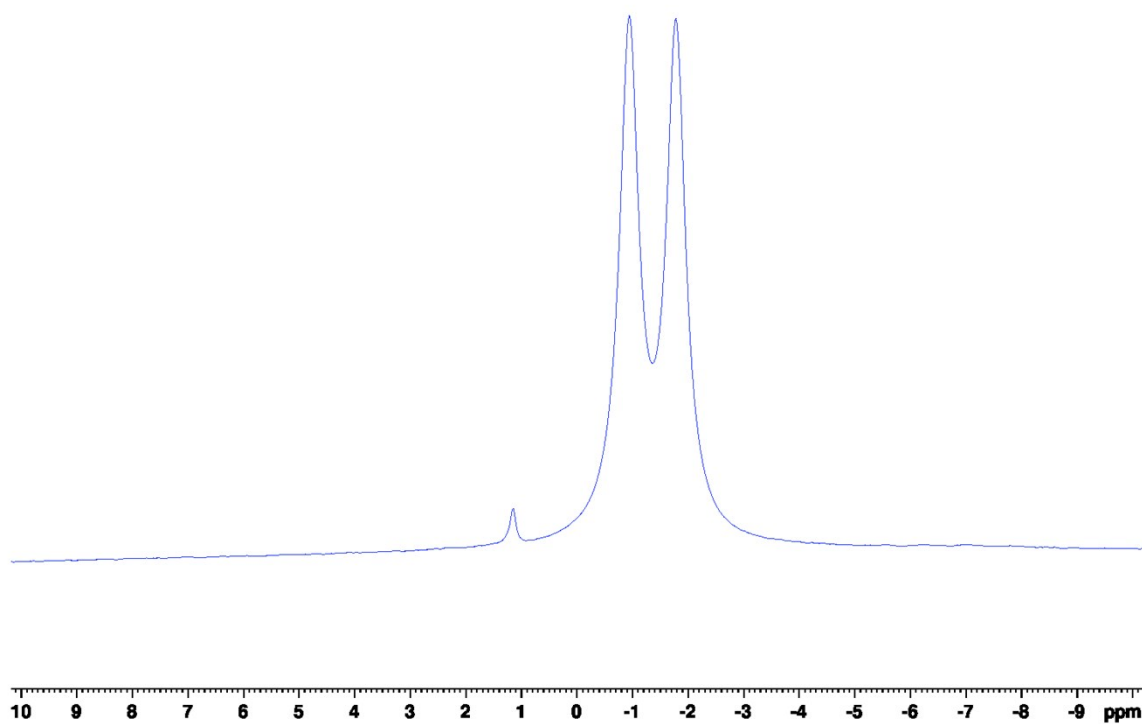

**Figure S1**  $^1\text{H}$ - (top) and  $^{11}\text{B}$ -NMR (bottom) spectra of KTp collected in  $d_6$ -acetone. (insert) Molecular structure of the Tp anion. Peak at  $\delta(^{11}\text{B}) \approx 1$  ppm is due to tetrakis-product.

Scorpionate 2

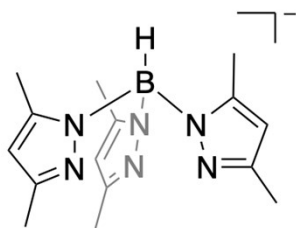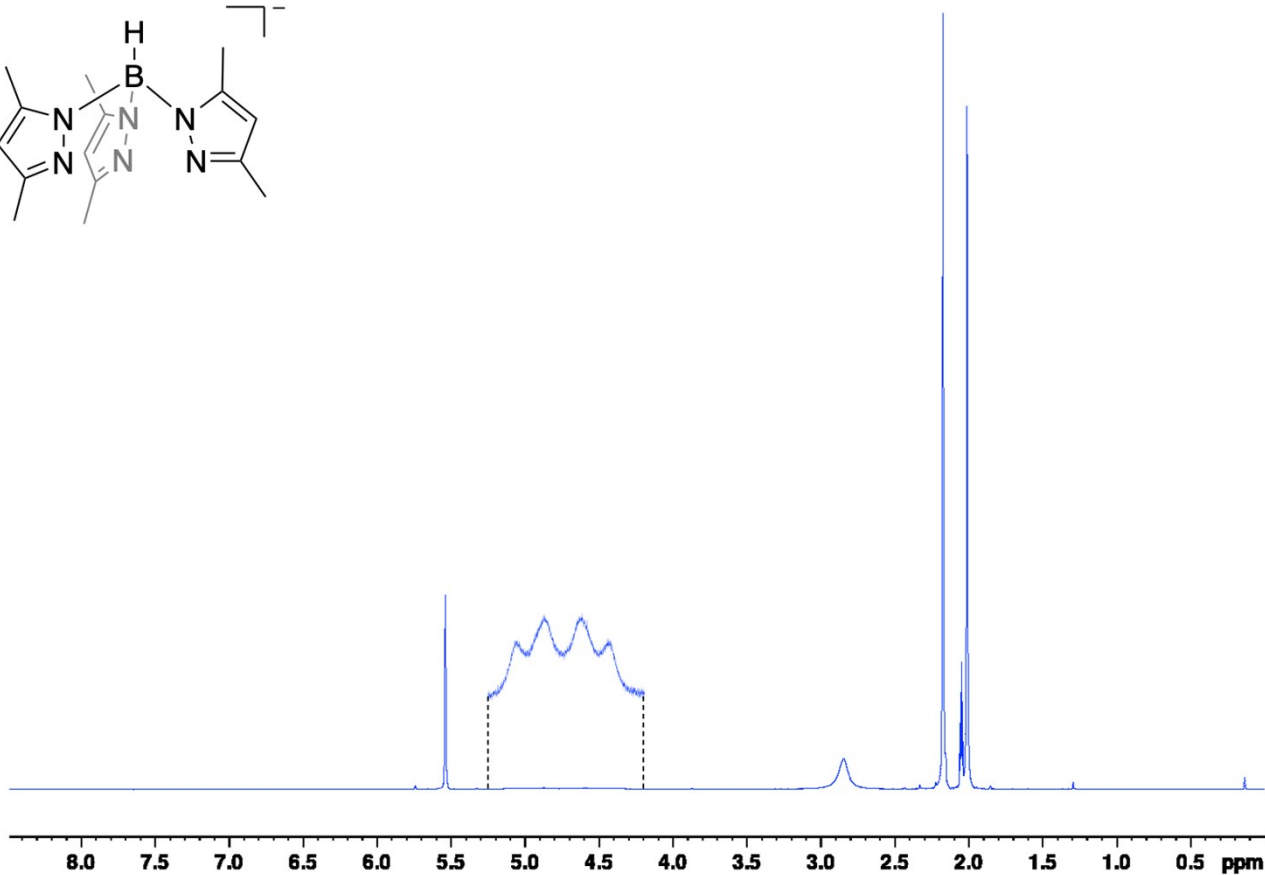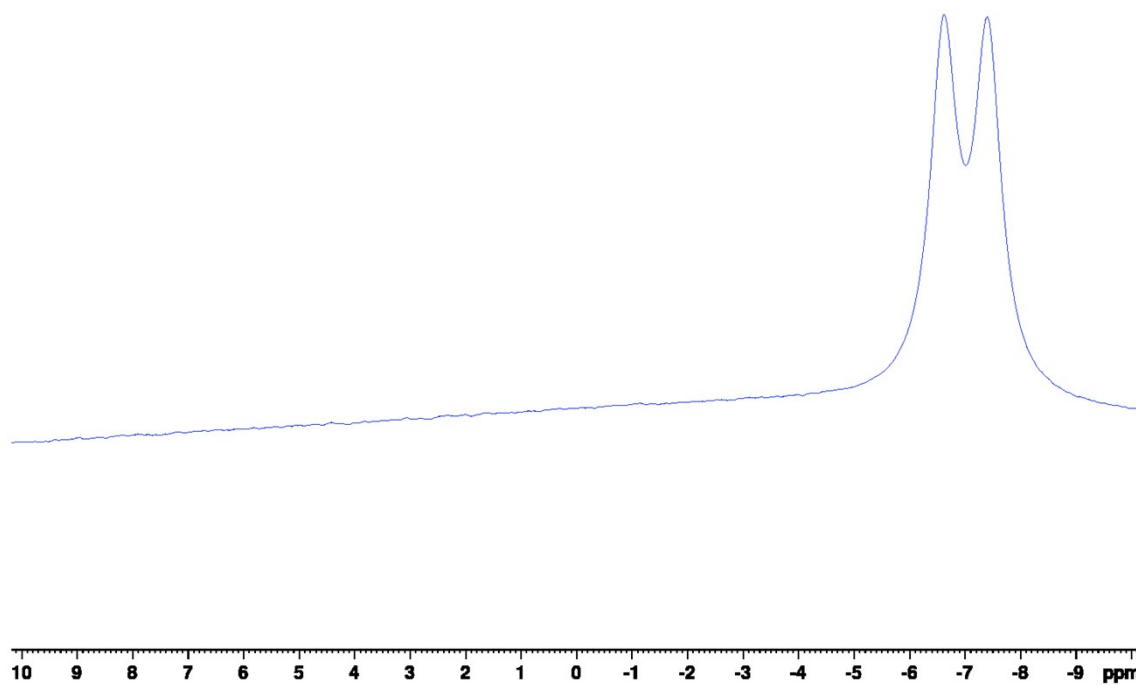

**Figure S2**  $^1\text{H}$ - (top) and  $^{11}\text{B}$ -NMR (bottom) spectra of  $\text{KTp}^{\text{Me}_2}$  collected in  $d_6$ -acetone. (insert) Molecular structure of the  $\text{Tp}^{\text{Me}_2}$  anion.

Scorpionate **3**

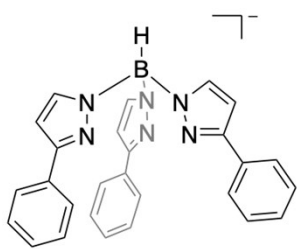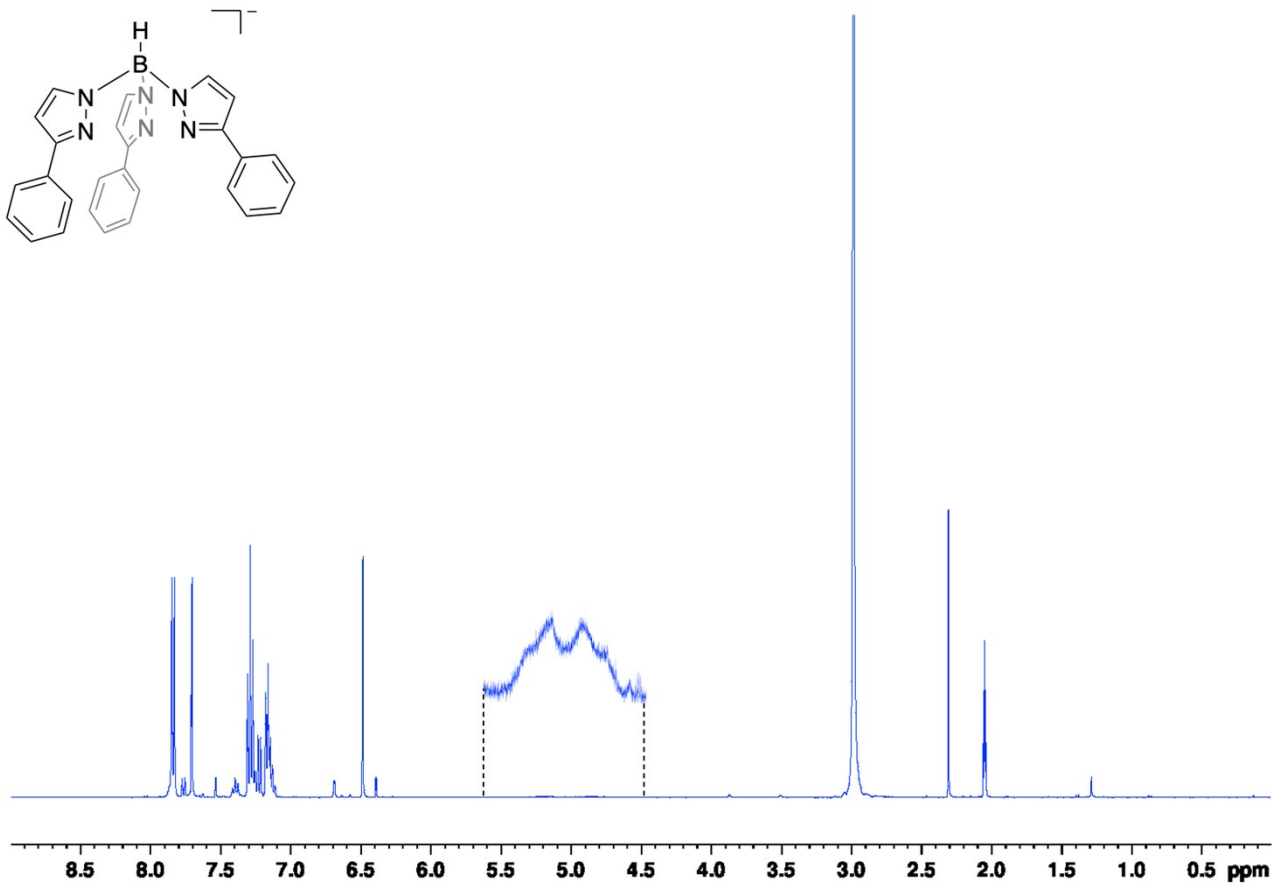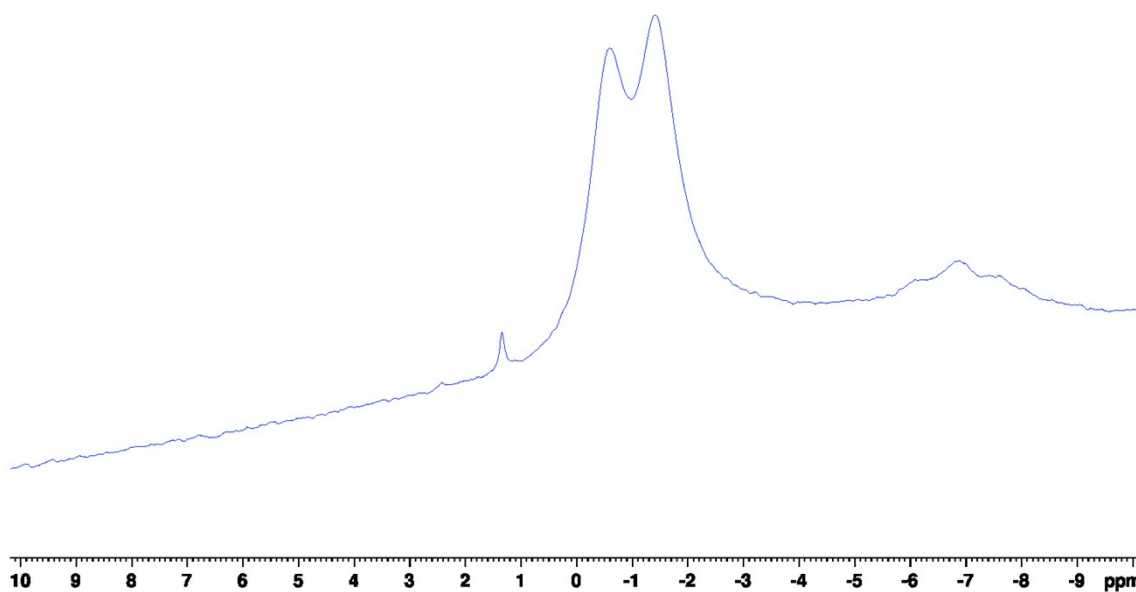

**Figure S3**  $^1\text{H}$ -(top) and  $^{11}\text{B}$ -NMR (bottom) spectra of  $\text{KTp}^{\text{Ph}}$  collected in  $d_6$ -acetone. (insert) Molecular structure of the  $\text{Tp}^{\text{Ph}}$  anion. Peaks at  $\delta(^{11}\text{B}) \approx 1$  ppm and  $-7$  ppm are due to tetrakis-product and bis-product respectively.

Scorpionate 4

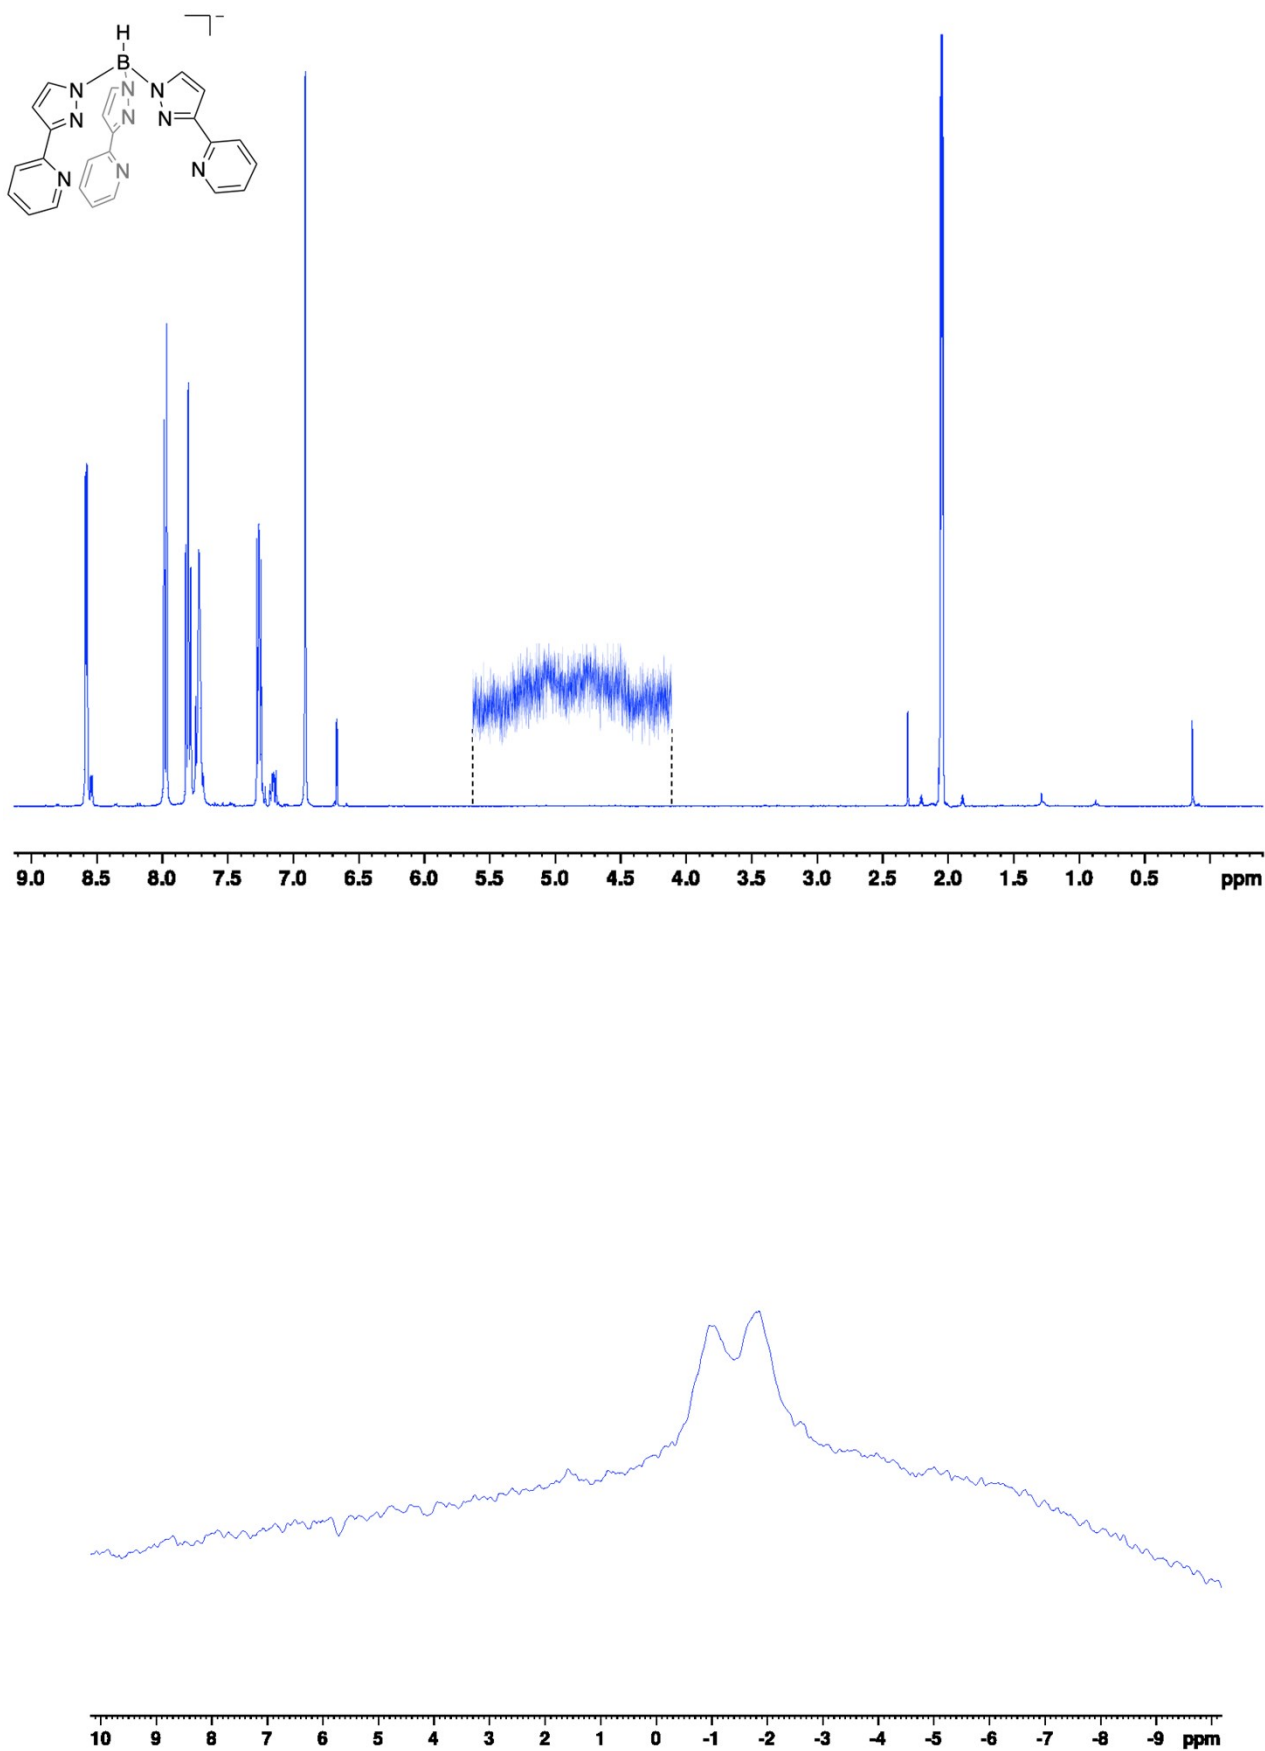

**Figure S4**  $^1\text{H}$ - (top) and  $^{11}\text{B}$ -NMR (bottom) spectra of  $\text{KTp}^{2-\text{py}}$  collected in  $d_6$ -acetone. (insert) Molecular structure of the  $\text{Tp}^{2-\text{py}}$  anion.

Scorpionate 5

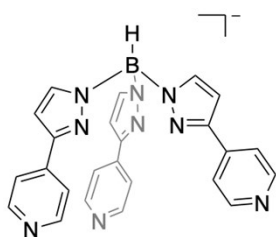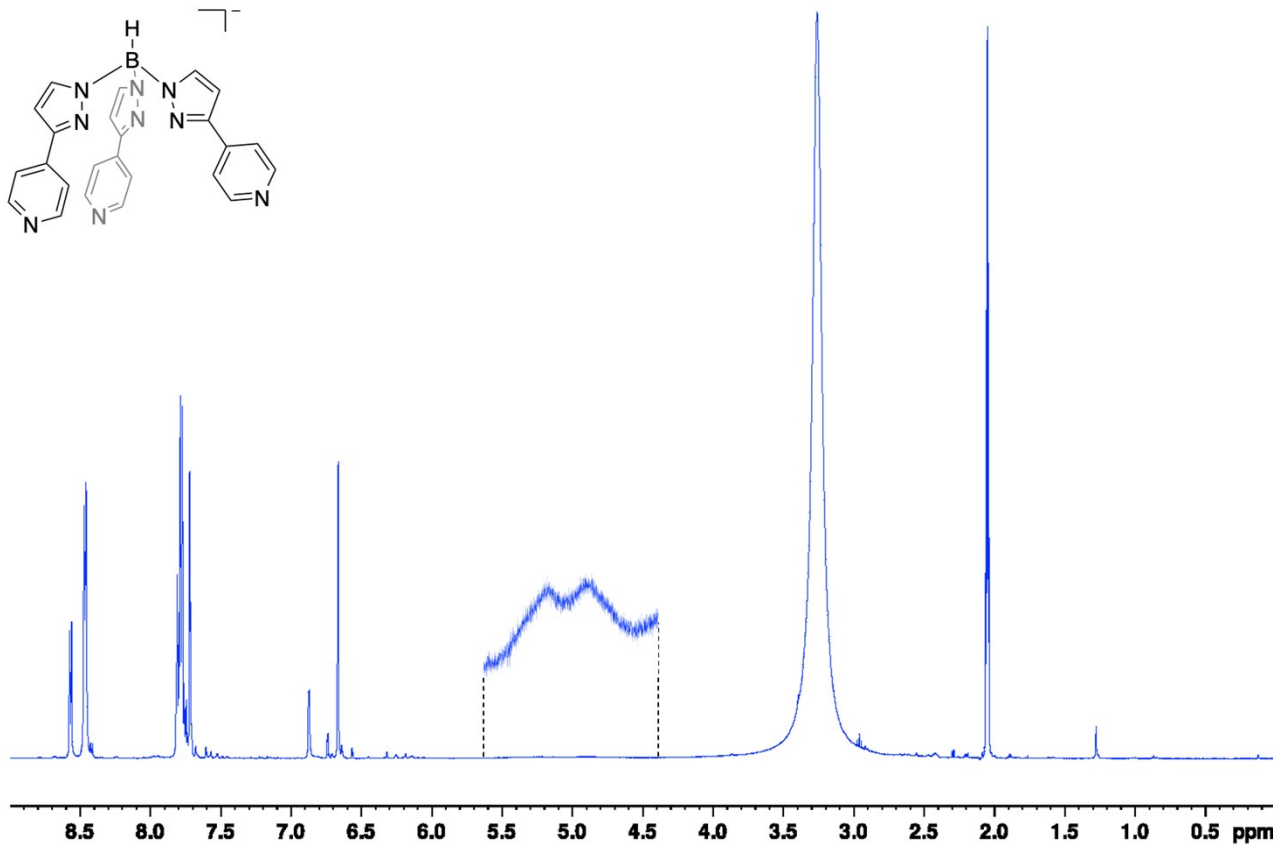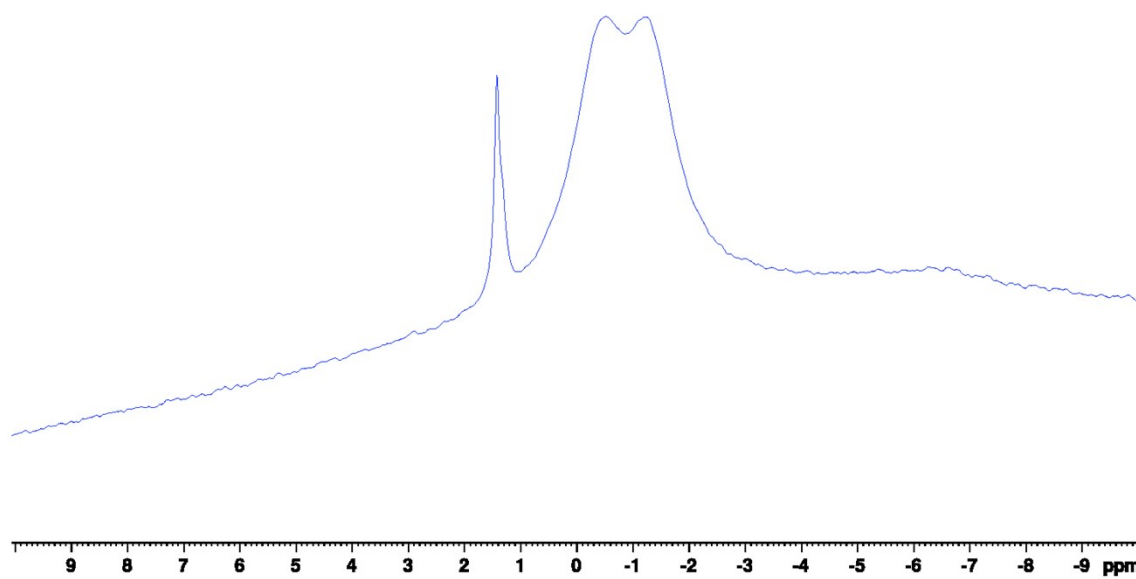

**Figure S5**  $^1\text{H}$ - (top) and  $^{11}\text{B}$ -NMR (bottom) spectra of  $\text{KTp}^{4-\text{py}}$  collected in  $d_6$ -acetone. (insert) Molecular structure of the  $\text{Tp}^{4-\text{py}}$  anion. Peak at  $\delta(^{11}\text{B}) \approx 1.5$  ppm is due to tetrakis-product.



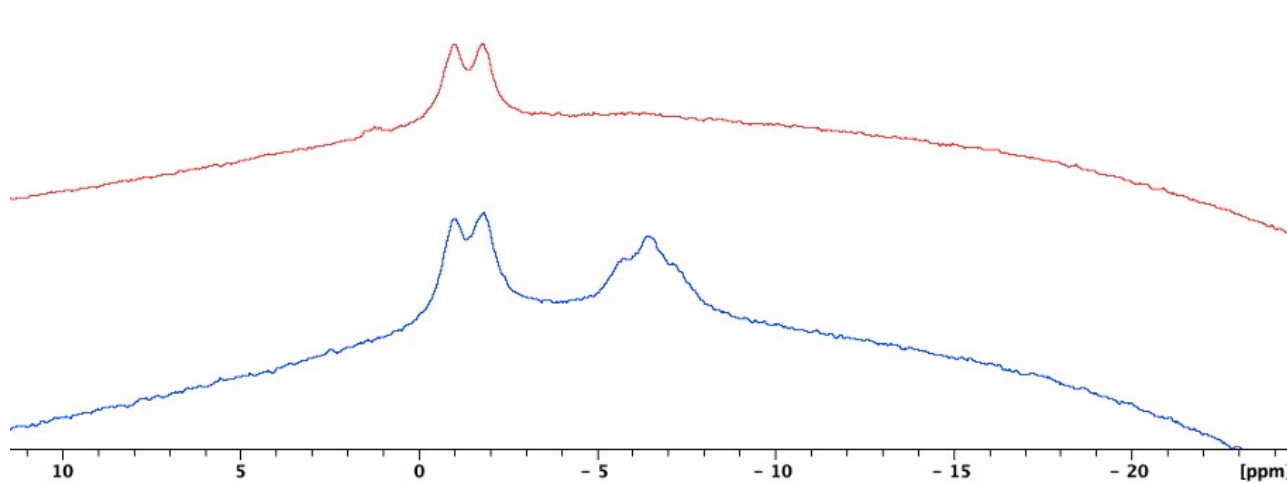

**Figure S6.**  $^{11}\text{B}$ -NMR spectra of aliquots from the reaction producing scorpionate **4**, collected in  $d_6$ -acetone. Aliquots were taken at 12 (blue) and 24 (red) hours. 12-hour aliquot shows presence of scorpionate **4** at  $\delta(^{11}\text{B}) = -1.43$  ppm and potassium dihydrobis(3-[2'-pyridyl]-pyrazolyl)borate at  $\delta(^{11}\text{B}) = -6.46$  ppm, whereas the 24-hour aliquot shows scorpionate **4** only at  $\delta(^{11}\text{B}) = -1.41$  ppm. Curved baselines are due to spectra being acquired in borosilicate NMR tubes.

### 3 Crystallographic Data and Figures of Scorpionate 6

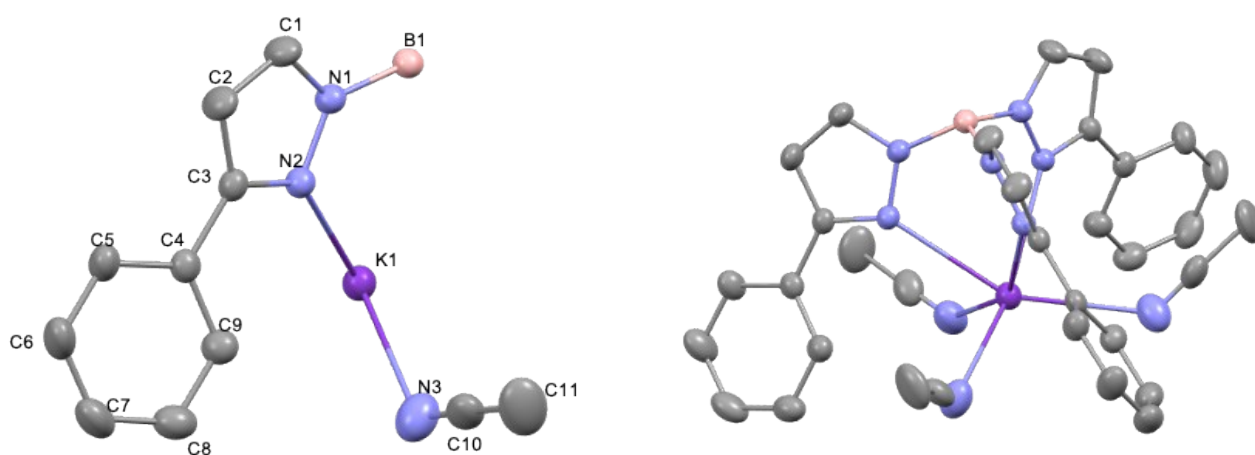

**Figure S7.** Asymmetric unit (left) and molecular structure (right) of scorpionate **6** shown with 30% ellipsoid, hydrogens have been omitted for clarity.

**Table S1** Crystallographic data for scorpionate **6**

|                                         |                                                               |
|-----------------------------------------|---------------------------------------------------------------|
| Empirical formular                      | $C_{33}H_{31}B_1K_1N_9$                                       |
| Formula weight/ g mol <sup>-1</sup>     | 603.58                                                        |
| Temperature/ K                          | 273                                                           |
| Crystal system                          | <i>P</i> -3                                                   |
| Space group                             | Trigonal                                                      |
| <i>a</i> / Å                            | 15.2163(6)                                                    |
| <i>b</i> / Å                            | 15.2163(6)                                                    |
| <i>c</i> / Å                            | 8.1910(4)                                                     |
| $\alpha$ / °                            | 90                                                            |
| $\beta$ / °                             | 90                                                            |
| $\gamma$ / °                            | 120                                                           |
| <i>V</i> / Å <sup>3</sup>               | 1642.42(15)                                                   |
| <i>Z</i>                                | 2                                                             |
| Density/ g cm <sup>-3</sup>             | 1.220                                                         |
| $\mu$ / mm <sup>-1</sup>                | 0.199                                                         |
| F(000)                                  | 632                                                           |
| Crystal size/ mm <sup>3</sup>           | 0.1 x 0.1 x 0.3                                               |
| Wavelength/ Å                           | 0.71073 (MoK $\alpha$ )                                       |
| $\theta$ range/ °                       | 2.487 – 27.175                                                |
| Index range                             | -19 ≤ <i>h</i> ≤ 19, -19 ≤ <i>k</i> ≤ 19, -10 ≤ <i>l</i> ≤ 10 |
| Reflections collected                   | 62318                                                         |
| Independent reflections                 | 2445 ( $R_{int} = 0.0677$ , $R_{sigma} = 0.0213$ )            |
| Data/restraints/parameters              | 2445/3/154                                                    |
| Final R indices ( $I \geq 2\sigma(I)$ ) | $R_1 = 0.0466$ , $R_2 = 0.1219$                               |

Final R indices (all data)

$R_1 = 0.0646, R_2 = 0.1354$

Goodness-of-fit on  $F^2$

1.095

---

#### 4 Reference

- 1 A. J. Amoroso, A. M. C. Thompson, J. C. Jeffery, P. J. Jones, J. A. McCleverty, M. D. Ward, *J. Chem. Soc., Chem. Commun.*, 1994, 2751.
- 2 O. V. Dolomanov, L. J. Bourhis, R. J. Gildea, J. A. K. Howard, H. Puschmann, *J. Appl. Cryst.*, 2009, **42**, 339.
- 3 G. M. Sheldrick, *Acta Cryst.*, 2015, **A71**, 3
- 4 G. M. Sheldrick, *Acta Cryst.*, 2015, **C71**, 3
